# Supplementary material
Source: PubMed Central journal article supplement (PMC6668342)
Supplement: NIHMS1519156-supplement-Supplementary_Tables.pdf [file NIHMS1519156-supplement-Supplementary_Tables.pdf]

**SUPPLEMENTARY TABLE 1. STATISTICS SOURCE DATA**

| Figure Number | Which Test?                             | Sample Size(N) | Sample Type | Descriptive STATS         | Exact p-value                                                                                                                                                      | Statistical values                                                                   |
|---------------|-----------------------------------------|----------------|-------------|---------------------------|--------------------------------------------------------------------------------------------------------------------------------------------------------------------|--------------------------------------------------------------------------------------|
| 1j            | Paired t-test (two-tailed)              | 6,7,7,6,6      | mice        | error bars are mean ± SEM | (Before vs Duration)<br>**p=0.0087<br>***p=0.0008<br>**p=0.0021<br>**p=0.0046                                                                                      | t(5) = 4.179<br>t(6) = 6.193<br>t(6) = 5.156<br>t(5) = 4.862<br>t(5) = 3.392         |
| 1m            | Paired t-test (two-tailed)              | 8              | mice        | error bars are mean ± SEM | (Saline vs LiCl)<br>**p=0.0019                                                                                                                                     | t(7)=4.844                                                                           |
| 2b            | One-way Repeated Measure (RM) ANOVA     | 11             | mice        | error bars are mean ± SEM | ***p=0.0001                                                                                                                                                        | F(1.287,12.87)=25.01<br>(No Assumption of sphericity; Geisser-Greenhouse correction) |
|               | Holm-Sidak post-hoc multiple comparison | 11             | mice        | error bars are mean ± SEM | Fed – Obj vs Chow<br>**p=0.0010<br>Fasted – Obj vs Chow:<br>**p=0.0019<br>Chow: Fed vs Fasted:<br>**p=0.0069                                                       | n/a                                                                                  |
| 2e            | One-way RM ANOVA                        | 11             | mice        | error bars are mean ± SEM | p=0.0001                                                                                                                                                           | F(1.734,19.07) = 16.69                                                               |
|               | Holm-Sidak post-hoc multiple comparison | 11             | mice        | error bars are mean ± SEM | Fed - Obj/cup vs Chow/cup :<br>*p =0.0133<br>Chow/cup vs Chow :<br>**p=0.0053<br>Fasted – Obj/cup vs Chow/cup :<br>*p=0.0298,<br>Chow/cup vs Chow :<br>**p= 0.0068 | n/a                                                                                  |
| 2h            | One-way RM ANOVA                        | 11             | mice        | error bars are mean ± SEM | P=0.0002                                                                                                                                                           | F (1.643, 16.43) = 16.19                                                             |
|               | Holm-Sidak post-hoc multiple comparison | 11             | mice        | error bars are mean ± SEM | Fed – PB/cup vs Peanut Butter:<br>**p=0.0031,<br>Fasted- PB/cup vs Peanut Butter :<br>**p=0.0026                                                                   | n/a                                                                                  |
| 2k            | One-way RM ANOVA                        | 11             | mice        | error bars are mean ± SEM | p=0.0003                                                                                                                                                           | F(1.277,12.77)=20.51                                                                 |
|               | Holm-Sidak post-hoc multiple comparison | 11             | mice        | error bars are mean ± SEM | Fasted-Chow vs Fasted-Chow/cup,<br>p= 0.2634<br><br>Fasted-Chow vs Fasted-Object,<br>***p=0.0005<br>Fasted-Chow vs Fed-Chow,<br>**p=0.0016                         | n/a                                                                                  |
| 2l            | One-way RM ANOVA                        | 11             | mice        | error bars are mean ± SEM | p=0.0107                                                                                                                                                           | F(1.15,11.5) = 8.694                                                                 |

|           |                                                |      |                                        |                               |                                                                                                                                          |                                                                                                         |
|-----------|------------------------------------------------|------|----------------------------------------|-------------------------------|------------------------------------------------------------------------------------------------------------------------------------------|---------------------------------------------------------------------------------------------------------|
|           | Holm-Sidak post-hoc multiple comparison        | 11   | mice                                   | error bars are mean $\pm$ SEM | Fed-PB/cup vs PB, p=0.0987<br>Fasted-PB/cup vs PB, p=0.0987<br><br>PB-fed vs PB-fasted, **p=0.0064<br>PB/cup-fed vs PB-fasted, *p=0.0389 | n/a                                                                                                     |
| 3b        | Mann-Whitney U test (two-tailed)               | 12,8 | mice                                   | error bars are mean $\pm$ SEM | (Female vs Male)<br>**p=0.0030                                                                                                           | U=11.000                                                                                                |
| 3b        | Wilcoxon matched signed rank test (two-tailed) | 7,8  | female mice                            | error bars are mean $\pm$ SEM | (Fake vs Pup)<br>*p=0.0156                                                                                                               | W=28.000                                                                                                |
| 3g        | Paired t-test (two-tailed)                     | 5    | mice                                   | error bars are mean $\pm$ SEM | (Before vs Duration)<br>*p=0.0215                                                                                                        | t(4)= 3.665                                                                                             |
| 4e        | Two-way RM ANOVA                               | 10,7 | mice, ChR2 and eYFP control            | error bars are mean $\pm$ SEM | Different days, p=0.1075;<br>Between groups, p =0.0480; and interaction, p=0.0126                                                        | Different days, F(5,75)=1.882;<br>Between groups, F(1,15)=4.638;<br>and interaction F(5,75) =3.14       |
| 4e        | Holm-Sidak post-hoc multiple comparison        | 10,7 | mice, ChR2 and eYFP control            | error bars are mean $\pm$ SEM | (ChR2 vs eYFP)<br>Day2, p=0.9166<br>Day3, p=0.7745<br>Day4, p=0.0717<br>Day5, *p=0.0448;<br>Post, *p=0.0134                              | n/a                                                                                                     |
| 4f        | Paired t-test (two-tailed)                     | 10,7 | mice, ChR2 and eYFP control            | error bars are mean $\pm$ SEM | (Pre vs Post)<br>ChR2:<br>****p<0.0001<br>eYFP control<br>p=0.9542                                                                       | t(9)=6.794<br>t(6)=0.05982                                                                              |
| 5e        | Two-way RM ANOVA                               | 11,8 | mice, eArch3.0 and eYFP control        | error bars are mean $\pm$ SEM | Different days, p=0.5565;<br>Between groups, **p =0.0011; and interaction, ***p=0.0001                                                   | Different days, F(5,85)=0.7947;<br>Between groups, F(1,17)=15.28;<br>and interaction F(5,85) =5.803     |
| 5e        | Holm-Sidak post-hoc multiple comparison        | 11,8 | mice, eArch3.0 and eYFP control        | error bars are mean $\pm$ SEM | (eArch3.0 vs eYFP)<br>Day2, *p=0.0259<br>Day3, *p=0.0258<br>Day4, *p=0.0259<br>Day5, ****p<0.0001<br>Post, ***p=0.0007                   | n/a                                                                                                     |
| 5e, inset | Two-way RM ANOVA                               | 11,8 | mice, eArch3.0 and eYFP control (Day2) | error bars are mean $\pm$ SEM | Different time points, p=0.0971<br>Between groups, p=0.0118; and interaction, **p=0.0123                                                 | Different time points, F(5,85) = 1.934; Between groups, F(1,17)=7.949; and interaction, F(5,85) = 3.122 |
| 5e, inset | Holm-Sidak post-hoc multiple comparison        | 11,8 | mice, eArch3.0 and eYFP control        | error bars are mean $\pm$ SEM | (eArch3.0 vs eYFP)<br>5mins, p=0.2661<br>10mins, p=0.2661<br>15mins, *p=0.0251<br>20mins, *p=0.0251                                      | n/a                                                                                                     |

|             |                                                  |      |                                             |                              |                                                                                                                     |                                                                                                                    |
|-------------|--------------------------------------------------|------|---------------------------------------------|------------------------------|---------------------------------------------------------------------------------------------------------------------|--------------------------------------------------------------------------------------------------------------------|
|             |                                                  |      | (Day2)                                      |                              | 25mins, *p =0.0171<br>30mins, **p=0.0029                                                                            |                                                                                                                    |
| 5f          | Paired t-test<br>(two-tailed)                    | 11,8 | mice,<br>eArch3.0<br>and<br>eYFP<br>control | error bars are<br>mean ± SEM | (Pre vs Post)<br>eArch3.0,<br>**p=0.0058<br>eYFP,<br>p=0.1533                                                       | t(10)=3.49,<br>t(7)=1.601                                                                                          |
| 6c          | Two-way RM<br>ANOVA                              | 12,9 | mice,<br>ChR2<br>and<br>eYFP<br>control     | error bars are<br>mean ± SEM | Different days,<br>P<0.0001;<br>Between groups,<br>P<0.0001; and<br>interaction,<br>P=0.0057                        | Different days,<br>F(5,95)=18.41;<br>Between<br>groups,<br>F(1,19)=31.49;<br>and interaction<br>F(19,95) =2.01     |
| 6c          | Holm-Sidak<br>post-hoc<br>multiple<br>comparison | 12,9 | mice,<br>ChR2<br>and<br>eYFP<br>control     | error bars are<br>mean ± SEM | (ChR2 vs eYFP)<br>Day2, *p=0.0308<br>Day3, **p=0.0090<br>Day4, **p=0.0038<br>Day5, ****p<0.0001<br>Post ***p=0.0006 | n/a                                                                                                                |
| 6d          | Paired t-test<br>(two-tailed)                    | 12,9 | mice,<br>ChR2<br>and<br>eYFP<br>control     | error bars are<br>mean ± SEM | (Pre vs Post)<br>ChR2,<br>*p=0.0262<br>eYFP,<br>***p=0.0008                                                         | t(11)=2.363,<br>t(8)=5.223                                                                                         |
| 6e,<br>S10a | Two-way RM<br>ANOVA                              | 12,9 | mice,<br>ChR2<br>and<br>eYFP<br>control     | error bars are<br>mean ± SEM | Different days,<br>P=0.6506;<br>Between groups,<br>P<0.0001; and<br>interaction,<br>P=0.1403                        | Different days,<br>F(3,57)=0.5495;<br>Between<br>groups,<br>F(1,19)=29.23;<br>and interaction<br>F(3,57) =1.897    |
| 6e,<br>S10a | Holm-Sidak<br>post-hoc<br>multiple<br>comparison | 12,9 | mice,<br>ChR2<br>and<br>eYFP<br>control     | error bars are<br>mean ± SEM | (ChR2 vs eYFP)<br>Day2, *p=0.0236<br>Day3, ***p=0.0005<br>Day4, *p=0.0110<br>Day5, ****p<0.0001                     | n/a                                                                                                                |
| 6f,<br>S10b | Two-way RM<br>ANOVA                              | 12,9 | mice,<br>ChR2<br>and<br>eYFP<br>control     | error bars are<br>mean ± SEM | Different days,<br>P=0.0527;<br>Between groups,<br>P<0.0001;<br>and interaction,<br>P=0.2488                        | Different days,<br>F(3,57)=2.723;<br>Between<br>groups,<br>F(1,19)=27.71;<br>and interaction<br>F(3,57) =1.411     |
| 6f,<br>S10b | Holm-Sidak<br>post-hoc<br>multiple<br>comparison | 12,9 | mice,<br>ChR2<br>and<br>eYFP<br>control     | error bars are<br>mean ± SEM | (ChR2 vs eYFP)<br>Day2, **p=0.0098<br>Day3, **p=0.0033<br>Day4, **p=0.0011<br>Day5, ****p<0.0001                    | n/a                                                                                                                |
| 6g          | Two-way RM<br>ANOVA                              | 12,9 | mice,<br>ChR2<br>and<br>eYFP<br>control     | error bars are<br>mean ± SEM | 3' time bins,<br>P<0.0001;<br>Between groups,<br>P=0.0009;<br>and interaction,<br>P<0.0001                          | 15' time bins,<br>F(10,250)=84.54<br>Between<br>groups,<br>F(1,25)=14.1;<br>and interaction<br>F(10,250)<br>=12.58 |
| 6g          | Holm-Sidak<br>post-hoc<br>multiple<br>comparison | 12,9 | mice,<br>ChR2<br>and<br>eYFP<br>control     | error bars are<br>mean ± SEM | (ChR2 vs eYFP)<br>15', **p=0.0098<br>18', **p=0.0015<br>21'~30', ****p<0.0001                                       | n/a                                                                                                                |
| 7c          | Unpaired<br>t-test                               | 7,8  | mice,                                       | error bars are<br>mean ± SEM | (eArc3.0 vs eYFP)<br>***p=0.0001                                                                                    | t(13)=5.434                                                                                                        |

|      |                                         |      |                                 |                               |                                                                                                   |                                |
|------|-----------------------------------------|------|---------------------------------|-------------------------------|---------------------------------------------------------------------------------------------------|--------------------------------|
|      | (two-tailed)                            |      | eArch3.0 and eYFP control       |                               |                                                                                                   |                                |
| 7d   | Paired t-test (two-tailed)              | 7,8  | mice, eArch3.0 and eYFP control | error bars are mean $\pm$ SEM | (Pre vs Post) eArch3.0, p=0.8975; eYFP ***p=0.0001                                                | t(6)=0.1344, t(7)=7.621        |
| 7e   | Unpaired t-test (two-tailed)            | 7,8  | mice, eArch3.0 and eYFP control | error bars are mean $\pm$ SEM | (eArch3.0 vs eYFP) *p=0.0149                                                                      | t(13)=2.805                    |
| 7f   | Paired t-test (two-tailed)              | 7,8  | mice, eArch3.0 and eYFP control | error bars are mean $\pm$ SEM | (Pre vs Post) eArch3.0, p=0.7690; eYFP *p=0.0147                                                  | t(6)=0.3073, t(7)=3.219        |
| S3a  | Mann-Whitney U test (two-tailed)        | 7,4  | mice                            | error bars are mean $\pm$ SEM | (Above vs Side) **p=0.0061                                                                        | U=0.0                          |
| S3b  | Paired t-test (two-tailed)              | 6    | mice                            | error bars are mean $\pm$ SEM | (Above vs Side) *p=0.0369<br>(Above vs Bottom) *p=0.0331                                          | t(5)=2.764<br>t(5)=2.917       |
| S4a  | One-way RM ANOVA                        | 7    | mice                            | error bars are mean $\pm$ SEM | **p=0.0074                                                                                        | F(1.890, 11.34) = 7.993        |
|      | Holm-Sidak post-hoc multiple comparison | 7    | mice                            | error bars are mean $\pm$ SEM | (0 vs 22hr) p=0.0652,<br>(22hr vs refed) *p=0.0216,<br>(0 vs refed) p=0.2220                      | n/a                            |
| S4b  | One-way RM ANOVA                        | 7    | mice                            | error bars are mean $\pm$ SEM | ****p<0.0001                                                                                      | F(1.998, 11.99) = 22.26        |
|      | Holm-Sidak post-hoc multiple comparison | 7    | mice                            | error bars are mean $\pm$ SEM | (0 vs 22hr) *p=0.0293,<br>(22hr vs refed) **p=0.0015,<br>(0 vs refed) *p=0.0293                   | n/a                            |
| S6b  | One-way RM ANOVA                        | 11   | mice                            | error bars are mean $\pm$ SEM | ***p=0.0003                                                                                       | F(1.531, 15.31) = 16.59        |
|      | Holm-Sidak post-hoc multiple comparison | 11   | mice                            | error bars are mean $\pm$ SEM | (Object vs Chow) Fed: *p=0.0197,<br>Fasted: **p=0.0021,<br>Fed-object vs Fasted-object, *p=0.0231 | n/a                            |
| S6d  | Paired t-test (two-tailed)              | 12,8 | male or female mice             | error bars are mean $\pm$ SEM | (Baseline vs Pup) Male: p = 0.4382<br>Female: *p= 0.0103                                          | t(11)=0.8044<br>t(7)=3.476     |
| S9   | Paired t-test (two-tailed)              | 5    | mice                            | error bars are mean $\pm$ SEM | (Baseline vs invest.) p=0.1079                                                                    | t(4)=2.065                     |
| S10d | Two-way RM ANOVA                        | 12,9 | mice,                           | error bars are mean $\pm$ SEM | Different days, p=0.6506;                                                                         | Different days, F(3,57)=2.233; |

|           |                                         |      |                             |                               |                                                                                                                                                                 |                                                                                                                 |
|-----------|-----------------------------------------|------|-----------------------------|-------------------------------|-----------------------------------------------------------------------------------------------------------------------------------------------------------------|-----------------------------------------------------------------------------------------------------------------|
|           |                                         |      | ChR2 and eYFP control       |                               | Between groups, $p < 0.0001$ ; and interaction, $p = 0.1403$                                                                                                    | Between groups, $F(1,19) = 29$ ; and interaction $F(3,57) = 1.294$                                              |
| S10d      | Holm-Sidak post-hoc multiple comparison | 12,9 | mice, ChR2 and eYFP control | error bars are mean $\pm$ SEM | (ChR2 vs eYFP)<br>Day2, * $p = 0.0360$<br>Day3, * $p = 0.0360$<br>Day4, * $p = 0.0360$<br>Day5, **** $p < 0.0001$                                               | n/a                                                                                                             |
| S10e-Day3 | Two-way RM ANOVA                        | 12,9 | mice, ChR2 and eYFP control | error bars are mean $\pm$ SEM | 3' time bins, $p < 0.0001$ ;<br>Between groups, $p = 0.0009$ ;<br>and interaction, $p < 0.0001$                                                                 | 3' time bins, $F(10,250) = 58.9$<br>Between groups, $F(1,25) = 13.86$ ;<br>and interaction $F(10,250) = 7.786$  |
| S10e-Day3 | Holm-Sidak post-hoc multiple comparison | 12,9 | mice, ChR2 and eYFP control | error bars are mean $\pm$ SEM | (ChR2 vs eYFP)<br>15', * $p = 0.0235$<br>18', * $p = 0.0106$<br>21', ** $p = 0.0026$<br>24', *** $p = 0.0004$<br>27'~30', **** $p < 0.0001$                     | n/a                                                                                                             |
| S10e-Day4 | Two-way RM ANOVA                        | 12,9 | mice, ChR2 and eYFP control | error bars are mean $\pm$ SEM | 3' time bins, $p < 0.0001$ ;<br>Between groups, $p = 0.0061$ ;<br>and interaction, $p < 0.0001$                                                                 | 3' time bins, $F(10,250) = 83.55$<br>Between groups, $F(1,25) = 8.967$ ;<br>and interaction $F(10,250) = 6.566$ |
| S10e-Day4 | Holm-Sidak post-hoc multiple comparison | 12,9 | mice, ChR2 and eYFP control | error bars are mean $\pm$ SEM | (ChR2 vs eYFP)<br>15', * $p = 0.0352$<br>18', * $p = 0.0439$<br>21', * $p = 0.0313$<br>24', *** $p = 0.0008$<br>27', **** $p < 0.0001$<br>30', *** $p = 0.0002$ | n/a                                                                                                             |
| S10e-Day5 | Two-way RM ANOVA                        | 12,9 | mice, ChR2 and eYFP control | error bars are mean $\pm$ SEM | 3' time bins, $p < 0.0001$ ;<br>Between groups, $p = 0.0006$ ;<br>and interaction, $p < 0.0001$                                                                 | 3' time bins, $F(10,250) = 93.97$<br>Between groups, $F(1,25) = 15.57$ ;<br>and interaction $F(10,250) = 12.17$ |
| S10e-Day5 | Holm-Sidak post-hoc multiple comparison | 12,9 | mice, ChR2 and eYFP control | error bars are mean $\pm$ SEM | (ChR2 vs eYFP)<br>12', * $p = 0.0218$<br>15', ** $p = 0.0021$<br>18', *** $p = 0.0003$<br>21'~30', **** $p < 0.0001$                                            | n/a                                                                                                             |

## SUPPLEMENTARY TABLE 2. BEHAVIOR ANNOTATIONS

The terms for annotated behavioral responses during GCaMP recordings are described.

| Session                              | Annotation text |           | Description                                                                                                       |
|--------------------------------------|-----------------|-----------|-------------------------------------------------------------------------------------------------------------------|
| <b>FST</b>                           | Intro. to water |           | The moment at which the recorded mouse was put into the water                                                     |
|                                      | Swimming        |           | Swimming, rotating in the water-containing cylinder                                                               |
|                                      | Climbing        |           | Trying to climb up the cylinder using their limbs                                                                 |
| <b>Tail restraint</b>                | Chased          |           | The moment at which the recorded mouse was chased by a human hand                                                 |
|                                      | Struggle        |           | Display of struggling behavior while being grabbed with a hand                                                    |
| <b>Overhead object /Looming disk</b> | Overhead object |           | Presentation of a bird-like object flying overhead                                                                |
|                                      | Looming disk    |           | Presentation of a visual shaded looming disk from above                                                           |
|                                      | Flight          |           | Display of flight response or running to a nest when exposed to a looming disk from above                         |
|                                      | In nest         |           | Hiding in a nest when exposed to a looming disk                                                                   |
|                                      | Freezing        |           | Display of freezing response or immobility; a period during which speed of an animal decreases to less than 2cm/s |
| <b>TMT</b>                           | Flight          |           | Display of flight response when exposed to TMT                                                                    |
|                                      | Freezing        |           | Display of freezing response when exposed to TMT                                                                  |
| <b>Feeding related behaviors</b>     | Investigation   |           | Display of Investigating (such as licking or biting) an object or a cup                                           |
|                                      | First bite      |           | The moment at which a mouse had the first bite of chow pellet or peanut butter                                    |
|                                      | Consumption     |           | Display of consuming chow pellet or peanut butter                                                                 |
| <b>Aggression</b>                    | Attacked        |           | Display of being bitten by a CD1 aggressive intruder                                                              |
|                                      | Investigation   |           | Display of being sniffed by a CD1 aggressive intruder                                                             |
| <b>Pup-tending behaviors</b>         | interaction     | Sniffing  | Display of sniffing a pup by the recorded mouse                                                                   |
|                                      |                 | Grooming  | Display of grooming or licking a pup                                                                              |
|                                      |                 | Crouching | Display of crouching-over a pup underneath tummy with the fixed hind legs                                         |
|                                      | Approach        |           | Display of approaching to a pup                                                                                   |
|                                      | Intro/Remove    |           | The moment of introduction/removal of a pup by an experimenter's hand                                             |
